# Supplementary material for: ISWI catalyzes nucleosome sliding in condensed nucleosome arrays
Source: PubMed Central journal article supplement — bioRxiv. 2023 Dec 4:2023.12.04.569516. Preprint. [Version 1] doi: 10.1101/2023.12.04.569516 (PMC10723341; doi:10.1101/2023.12.04.569516), 2023-12-04
Supplement: NIHPP2023.12.04.569516v1-supplement-1.pdf [file NIHPP2023.12.04.569516v1-supplement-1.pdf]

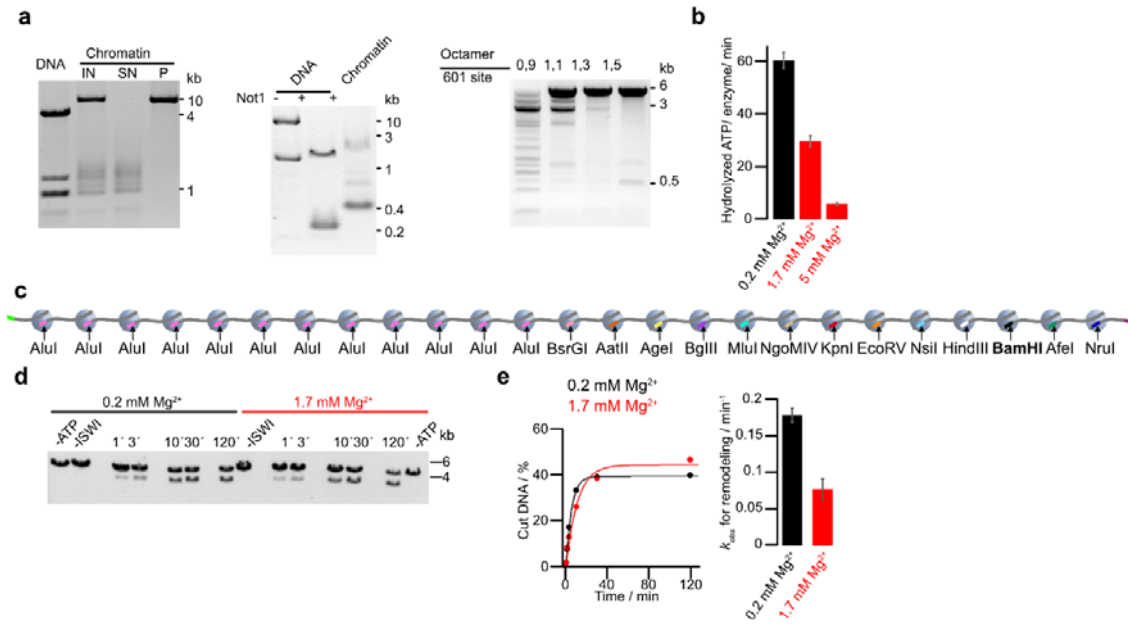

890

891 **Figure S1. a**, Quality controls for 25mer nucleosome arrays. Left: agarose gel after magnesium  
 892 precipitation of assembled arrays and the resolubilized pellet. IN, input; SN, supernatant; P, pellet.  
 893 Competitor DNA derived from the plasmid backbone (< 1 kb) was excluded from P. Middle: Not1  
 894 digestion (a Not1 site is present in each linker) liberated mostly mononucleosomes, running around  
 895 400 bp, but little 197 bp fragments, confirming saturation of most 601 repeats with octamers. Right:  
 896 BsiWI digestion (all nucleosomes occlude a BsiWI restriction site) for arrays assembled with different  
 897 octamer amounts. As 601 sites become saturated, digestion is hindered. **b**, ATP turnover in the  
 898 presence of saturating concentrations of mononucleosomes (1.33  $\mu$ M). Control experiments with  
 899 three times lower mononucleosome concentrations gave the same results. Bars are mean values of  
 900 two independent experiments, error bars their minimal and maximal values. Increasing Mg-  
 901 concentrations reduce mononucleosome-stimulated ATP hydrolysis rates at saturating concentrations  
 902 of ATP (1 mM). **c**, As in Fig. 1a, but with different orientation of the unique restriction sites such that  
 903 the BamHI site is now more peripheral. **d**, BamHI accessibility assay as in Fig. 1f but for the array shown  
 904 in **c**. **e**, Left: quantification of gel in **d** and exponential fits of time courses. Right: rate coefficients from  
 905 single exponential fits. Bars are mean values of two independent experiments, error bars their minimal  
 906 and maximal values.

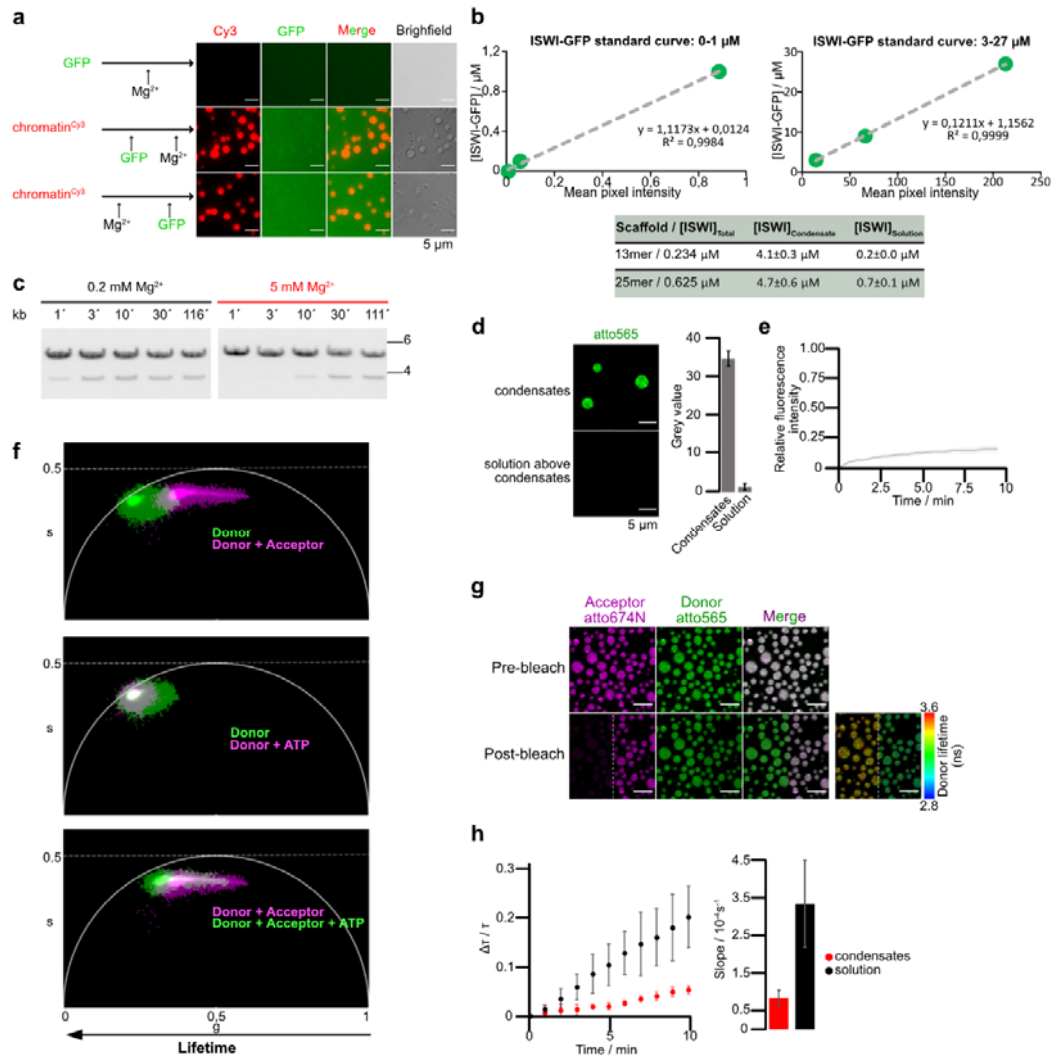

907

908 **Figure S2. a**, GFP does not partition into chromatin condensates. The colocalization experiment was  
 909 performed with 40 nM of unlabeled 25mer, 10 nM of 25mer-Cy3 and 1.125 μM of GFP-GST. **b**, ISWI-  
 910 GFP concentrations were determined inside condensates and, after centrifugation, in the surrounding  
 911 solution (bottom) from fluorescence intensities using calibration curves with ISWI-GFP dilutions (top).  
 912 Two different microscope settings were used to image lower and higher dilutions. Means and SD of  
 913 two independent replicates are shown. **c**, Nucleosome sliding time courses in absence and presence  
 914 of condensates (0.2 mM and 5 mM MgCl<sub>2</sub>, respectively), replicate of experiment in Fig. 2e. Sliding was  
 915 measured by KpnI accessibility of 25mer arrays (15 nM). Reactions contained 750 nM ISWI and were  
 916 started by addition of 1 mM Mg-ATP. **d**, Enrichment of labeled ON60 mononucleosomes in chromatin  
 917 condensates, N = 3 ± SD. The mononucleosome concentration in solution was determined from z-  
 918 plane above the condensates. **e**, Whole condensate FRAP of FRET-ON60 nucleosomes to assess their  
 919 exchange between condensate and solution. Line is an average and shadow SD of eight bleached  
 920 condensates. One of four independent replicates with similar results is shown. **f**, Phasor  
 921 representation of data in Fig. 2f. The phasor representation makes no assumptions on the number of  
 922 decay rates nor on specific decay model (exponential, non-exponential) (Digman et al., 2008). Upon

923 introduction of the acceptor, the donor's lifetime distribution moves away from the universal circle  
924 line (single exponential lifetimes). This is consistent with an existence of at least two or even three  
925 different populations of donor: high FRET, low FRET and no FRET. **g**, Acceptor bleaching enhances  
926 donor fluorescence and lifetime, indicative of FRET. Imaging of FRET-ON60 nucleosomes in chromatin  
927 condensates. The acceptor fluorophore was bleached in the left half of the field of view, leading to an  
928 increase in donor fluorescence and donor lifetime (right most panel). **h**, FLIM-FRET measurements as  
929 in Fig. 2h, but with 5 mM Mg-ATP. Means and SD of three independent experiments.

930

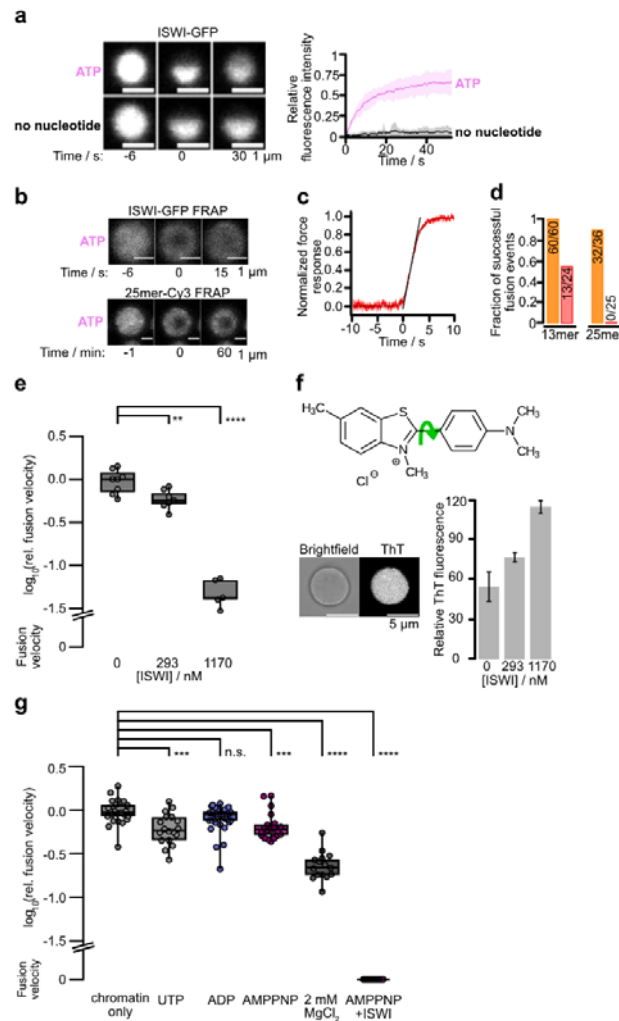

931

932 **Figure S3. a**, Intra-condensate mobility of ISWI-GFP measured by partial-condensate FRAP. Half of a  
 933 condensate was bleached in presence and absence of Mg-ATP (1 mM). Line is an average and shadow  
 934 SD of 15 bleached condensates for each condition. **b**, ISWI-GFP is more mobile than chromatin in  
 935 condensates. Dual FRAP of ISWI-GFP and Cy3-labeled condensates formed by 25mer arrays in  
 936 presence of Mg-ATP (1 mM) and ISWI (100 nM). Independent replicates show similar results. **c**, Force  
 937 readout of optical traps during controlled condensate fusion. The fusion velocity was determined as  
 938 the slope of the tangent fitted to the normalized force data at the inflection point of the fitted  
 939 function. Incurred forces during fusion are on the order of 1 pN (see Methods). **d**, Fraction of  
 940 successful fusion events in 1 mM MgCl<sub>2</sub> (orange) and 5 mM MgCl<sub>2</sub> (red). Total nucleosome  
 941 concentration was 1170 nM. **e**, Fusion between condensates measured by optical tweezers containing  
 942 indicated ISWI concentrations and 1170 nM nucleosomes. Velocities were estimated as illustrated in  
 943 Fig. S3c. Box plots show means and 25<sup>th</sup>/75<sup>th</sup> percentiles, whiskers the 9<sup>th</sup> and 91<sup>st</sup> percentiles. **f**, ISWI  
 944 increased viscosity of condensates as reported by enhanced fluorescence of the molecular rotor  
 945 thioflavin T (ThT). In a high viscosity medium, rotation around the C-C bond (green arrow) is  
 946 constrained, and the excitation energy is released as fluorescence. Bars are average ThT fluorescence  
 947 intensities relative to the outside medium; error: SD. Six condensates were analyzed for no ISWI and

948 293 nM ISWI, five for 1170 nM ISWI. **g**, Fusion between condensates without ISWI measured by optical  
 949 tweezers. Nucleotides and free  $Mg^{2+}$  show only modest effects on fusion velocity.

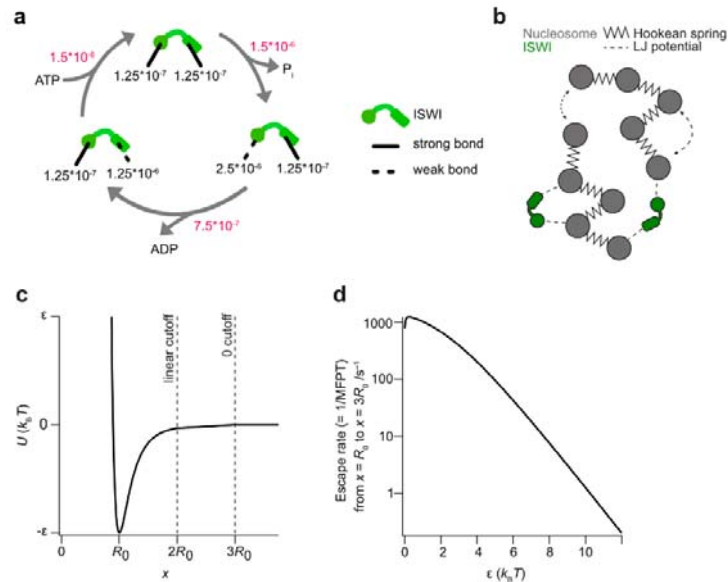

950

951 **Figure S4. a**, A model for the independent switching of the strengths of the two nucleosome  
 952 interaction sites during ISWI's ATPase cycle. Escape rates (black) and transition rates (red) in timestep  
 953  $\tau$  are indicated. **b**, Schematic representation of the implementation of the model in Fig. 4a for  
 954 molecular dynamics simulations. **c**, Modified Lennard-Jones potential used in simulations. Below  
 955 distances of  $2R_0$  a regular Lennard-Jones potential is used. Between  $2R_0$  and  $3R_0$  the potential is  
 956 described using a linear approximation, while interactions with range above  $3R_0$  are set to 0. **d**,  
 957 Conversion of the strength of the modified Lennard-Jones potential to escape rates based on the mean  
 958 first passage time of potential escape (Gray & Yong, 2021).

959 **Movie S1. FLIM-FRET timelapse with ATP**

960 **Movie S2. FLIM-FRET timelapse with AMPPNP**

961 **Movie S3. Controlled fusion with optical tweezers of chromatin condensates containing ISWI and**

962 **ADP-BeF<sub>x</sub>**

963 **Movie S4. Controlled fusion with optical tweezers of chromatin condensates containing ISWI and**

964 **ATP**

965 **Movie S5. Simulation of ISWI FRAP with graph**

966 **Movie S6. Simulation of condensate fusion with graph**

967 **Table S1. Oligonucleotide list**

| <b>Name</b> | <b>Sequence (5'-&gt;3')</b>      | <b>Description</b>                                                                                 |
|-------------|----------------------------------|----------------------------------------------------------------------------------------------------|
| oFMP839     | GCTTGCATGCCTGCAGGTCG             | To PCR ON60 fragment used for ATPase assay                                                         |
| oFMP864     | CTGGAGAATCCCGGTGCCG              | To PCR ON60 fragment used for ATPase assay and ON60-EcoRI fragment used for FLIM-FRET              |
| oFMP1260    | TAAGCAGAATTCGCTTGCATGCCTGCAGGTCG | To PCR [atto647N]ON60-EcoRI fragment used for FLIM-FRET                                            |
| oFMP1261    | [ATTO647N]CTGGAGAATCCCGGTGCCG    | To PCR [atto647N]ON60-EcoRI fragment used for FLIM-FRET and ON60-EcoRI fragment used for FLIM-FRET |

968
